# Supplementary material for: Estimation of intrafamilial DNA contamination in family trio genome sequencing using deviation from Mendelian inheritance
Source: HighWire-hosted journal article supplement (doi:10.1101/gr.276794.122), 2022-11-01
Supplement: Supplemental_Fig_S1.pdf [file Supplemental_Fig_S1.pdf]

**A**Father (*homo-ref*) + Mother (*homo-alt*); GroupA SNPs, maternal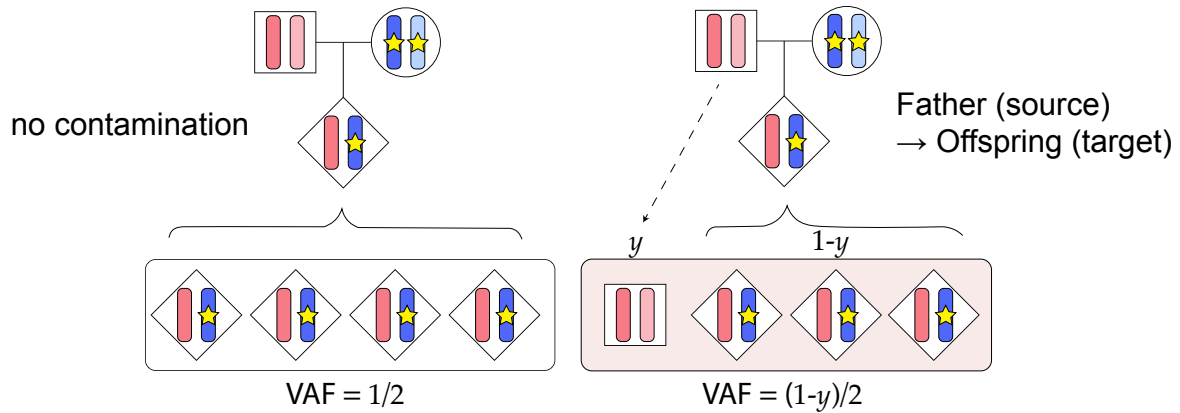**B**Father (*homo-alt*) + Mother (*homo-ref*); GroupA SNPs, paternal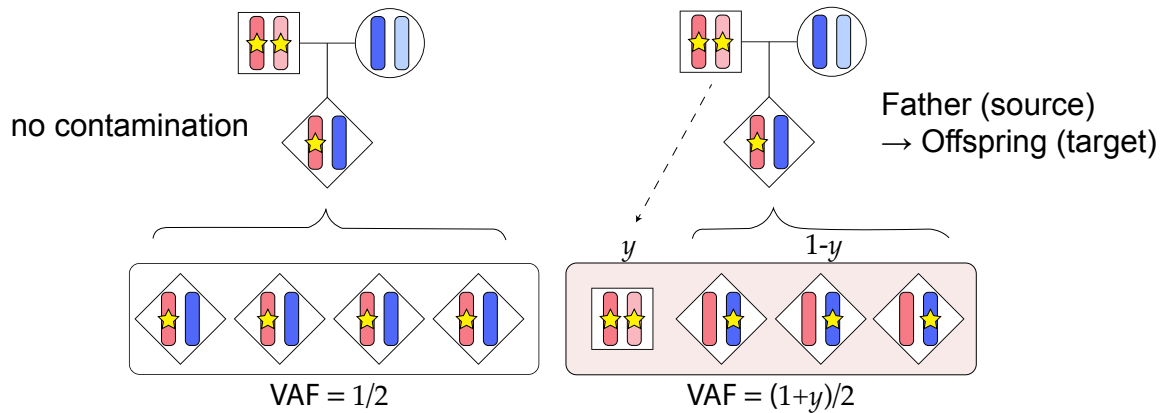

**Supplemental Figure S1. VAF changes when the father's DNA contaminates the offspring.** The fraction of contaminating the father's DNA is  $y$ . Alternative alleles are shown as yellow stars. (A) For maternal GroupA SNPs, VAFs are decreased to  $(1-y)/2$ . (B) For paternal GroupA SNPs, VAFs increase to  $(1+y)/2$ .
