# Supplementary material for: Estimation of intrafamilial DNA contamination in family trio genome sequencing using deviation from Mendelian inheritance
Source: HighWire-hosted journal article supplement (doi:10.1101/gr.276794.122), 2022-11-01
Supplement: Supplemental_Fig_S2.pdf [file Supplemental_Fig_S2.pdf]

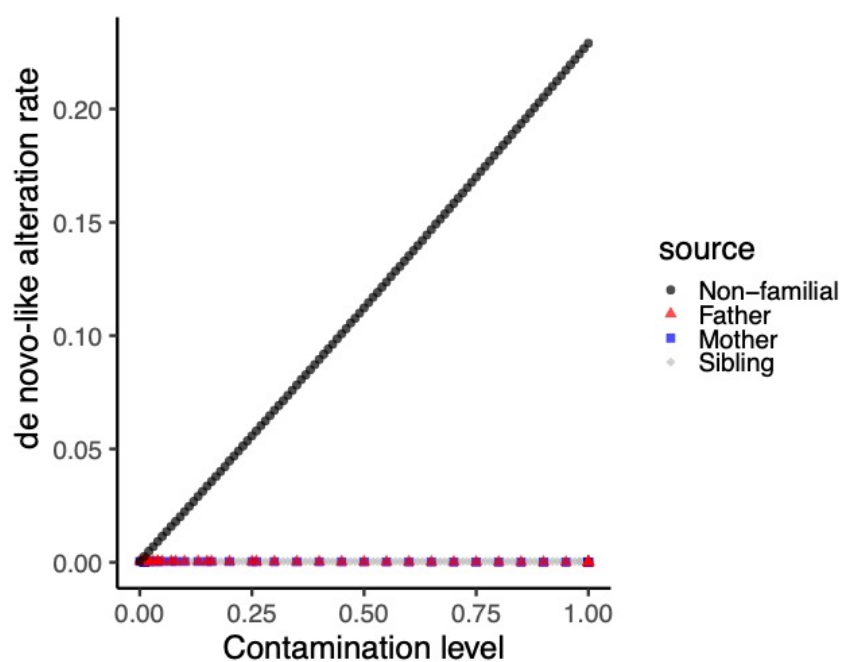

**Supplemental Figure S2. Relationship between contamination level and de novo-like alteration rate in various contamination sources.** Simulation of contamination with either the father (red triangle), mother (blue square), sibling (gray diamond), or non-familial individual (black circle), and their de novo-like alteration rate is shown.
