# Supplementary material for: Estimation of intrafamilial DNA contamination in family trio genome sequencing using deviation from Mendelian inheritance
Source: HighWire-hosted journal article supplement (doi:10.1101/gr.276794.122), 2022-11-01
Supplement: Supplemental_Fig_S3_.pdf [file Supplemental_Fig_S3_.pdf]

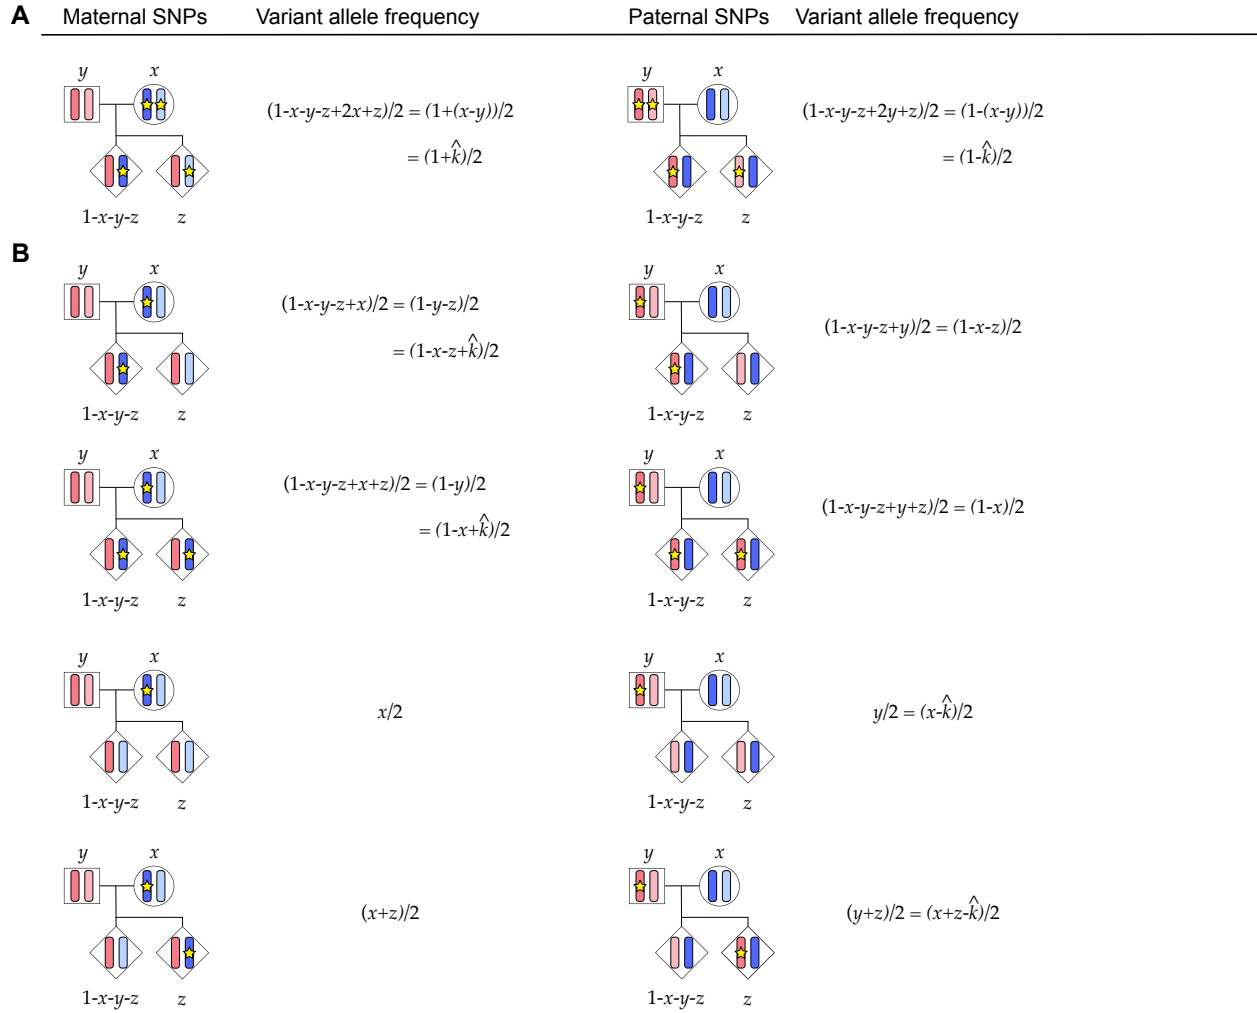

**Supplemental Figure S3. Maximum likelihood estimation framework for offspring DNA contamination by multiple family members.** (A) SNP loci where one parent is a *homo-alt* and the other parent is a *homo-ref* parent (GroupA SNPs) can be used to calculate the difference between the two parents. Contamination by the parent with *homo-alt* genotype is multiplied by 2 since the variant allele is present in both homologous chromosomes. Variant allele frequencies of mother, father, sibling, and target offspring are set as  $x$ ,  $y$ ,  $z$ , and  $1-x-y-z$ , respectively. Using these SNP loci, we calculate  $\hat{k}$ , the difference between the contribution of the mother's DNA and the father's DNA ( $x-y$ ). (B) SNP loci where one parent is *het* and the other parent is *homo-ref* (GroupB SNPs) can be used for estimating the remaining variables  $x$  and  $z$  by substituting  $y=x-\hat{k}$  for all variant allele frequencies.
