# Supplementary material for: Estimation of intrafamilial DNA contamination in family trio genome sequencing using deviation from Mendelian inheritance
Source: HighWire-hosted journal article supplement (doi:10.1101/gr.276794.122), 2022-11-01
Supplement: Supplemental_Fig_S5.pdf [file Supplemental_Fig_S5.pdf]

**A** Chimerism from dizygotic twin1 (sibling, 16.1%)

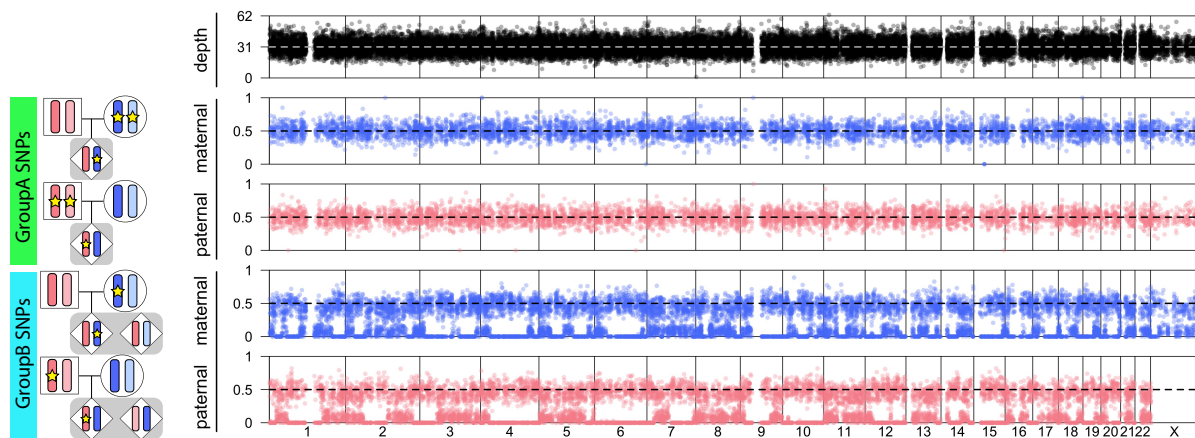

**B** Chimerism from dizygotic twin2 (sibling, 21.8%)

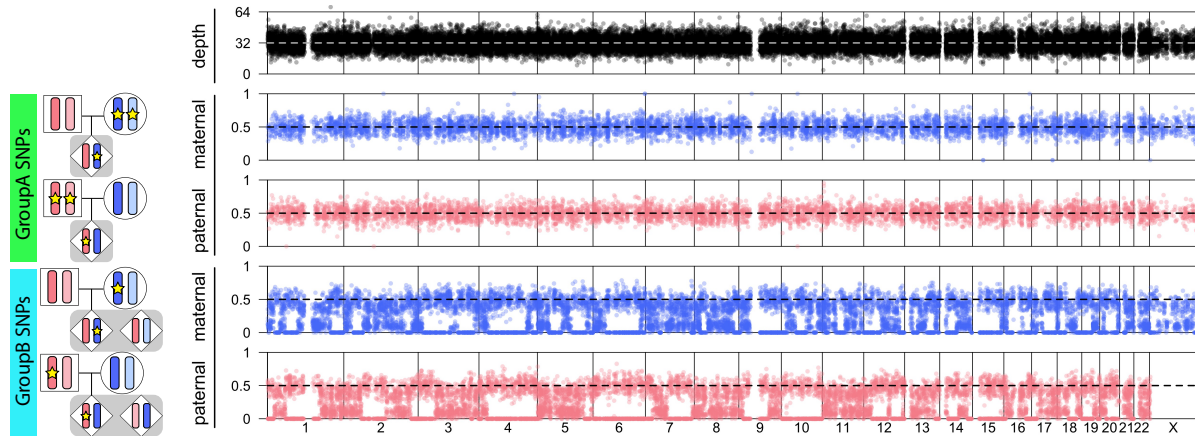

**Supplemental Figure S5. Variants from a monozygotic dizygotic twin with DNA chimerism.** Depth and VAF plots of chimeric dizygotic twins are shown for each SNP group. (A) Variants are shown for the first child in the dizygotic twin. (B) Variants are shown for the second child in the dizygotic twin. Additional DNA from a genetic sibling changes the VAF pattern in GroupB, but not in GroupA SNPs. Blue and red dots represent maternally and paternally inherited variants, respectively. The gray dashed line on the depth plot represents the mean autosomal depth. The black dashed lines on the VAF plots represent VAF=0.5.
