# Supplementary material for: Estimation of intrafamilial DNA contamination in family trio genome sequencing using deviation from Mendelian inheritance
Source: HighWire-hosted journal article supplement (doi:10.1101/gr.276794.122), 2022-11-01
Supplement: Supplemental_Fig_S6.pdf [file Supplemental_Fig_S6.pdf]

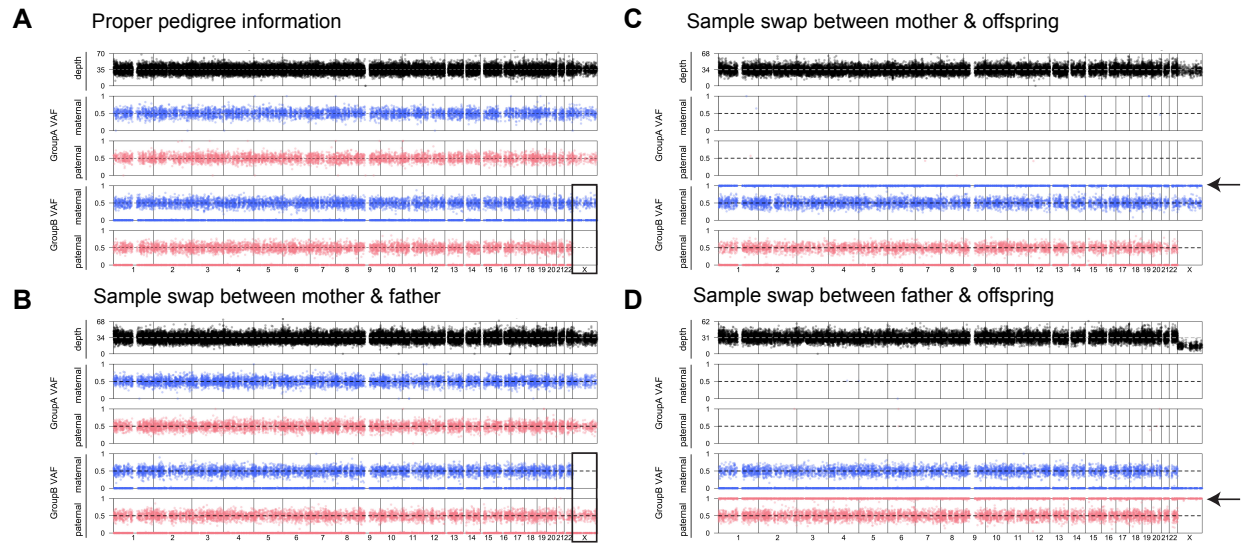

**Supplemental Figure S6. TrioMix can detect sample swaps between family members** (A) Genome-wide plot with correct pedigree information. (B) Sample swap between mother and father results in the swap of GroupB VAF patterns of Chromosome X (shown with a box). (C) Sample swap between mother and offspring leads to the absence of GroupA variants and *homo-alt* genotypes in maternal GroupB SNPs (indicated with an arrow). (D) Sample swap between father and offspring leads to the absence of GroupA variants and *homo-alt* genotypes in paternal GroupB SNPs (indicated with an arrow).
