# Supplementary material for: Estimation of intrafamilial DNA contamination in family trio genome sequencing using deviation from Mendelian inheritance
Source: HighWire-hosted journal article supplement (doi:10.1101/gr.276794.122), 2022-11-01
Supplement: Supplemental_Fig_S7.pdf [file Supplemental_Fig_S7.pdf]

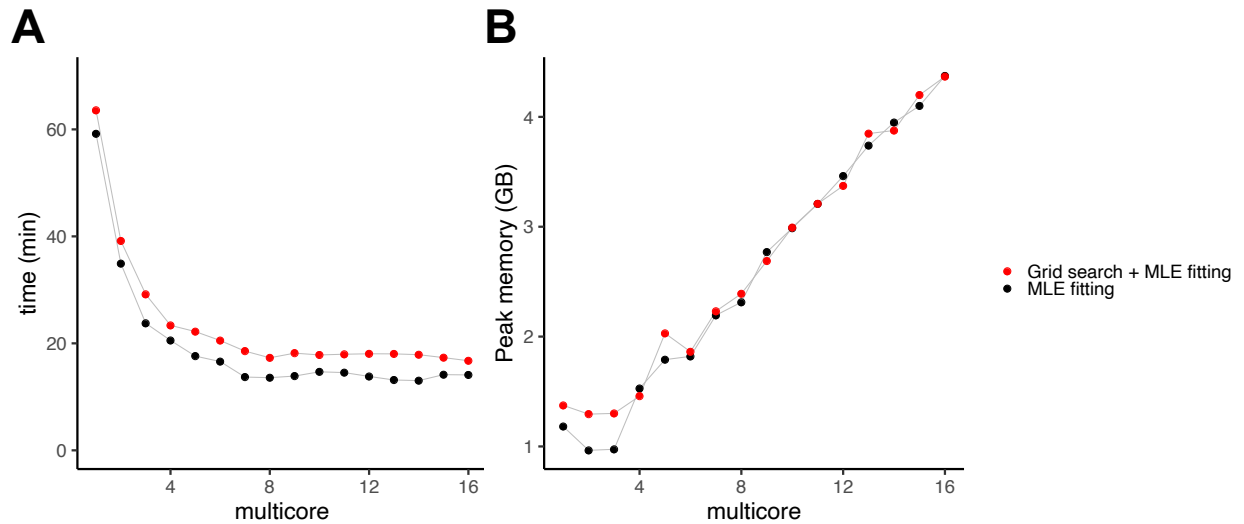

**Supplemental Figure S7. Computational performance of TrioMix.** Performance was demonstrated in two examples. When the sequence from NA19662 (offspring) is used, MLE optimization initially fails to converge, which then uses additional grid search methods to re-estimate the initial guesses for likelihood optimization (red circle). When the offspring's sequences were in silico contaminated with its sibling (NA19685) with 25%, optimization converges with initial guesses (black circle). (A) The total runtime of TrioMix is shown with a varying number of cores. Compute time is slightly increased for samples that do not converge initially (red circle). (B) Peak memory consumptions of TrioMix are shown with a varying number of cores. Performance evaluation was conducted on an AWS instance with a dockerized TrioMix on Ubuntu 20.04 LTS operating system with Intel(R) Xeon(R) CPU E5-2666 v3 @ 2.90GHz (max 16 CPU) processor. In this case, 1,907,413 common SNPs identified from gnomAD v3.0 for GRCh38 were used.
